# Supplementary material for: Scorpion Species with Smaller Body Sizes and Narrower Chelae Have the Highest Venom Potency
Source: MDPI journal article supplement (doi:10.3390/toxins14030219), 2022-03-17
Supplement: s1 [file s1]

Article

# Scorpion Species with Smaller Body Sizes and Narrower Chelae Have the Highest Venom Potency

Alannah Forde, Adam Jacobsen, Michel M. Dugon and Kevin Healy

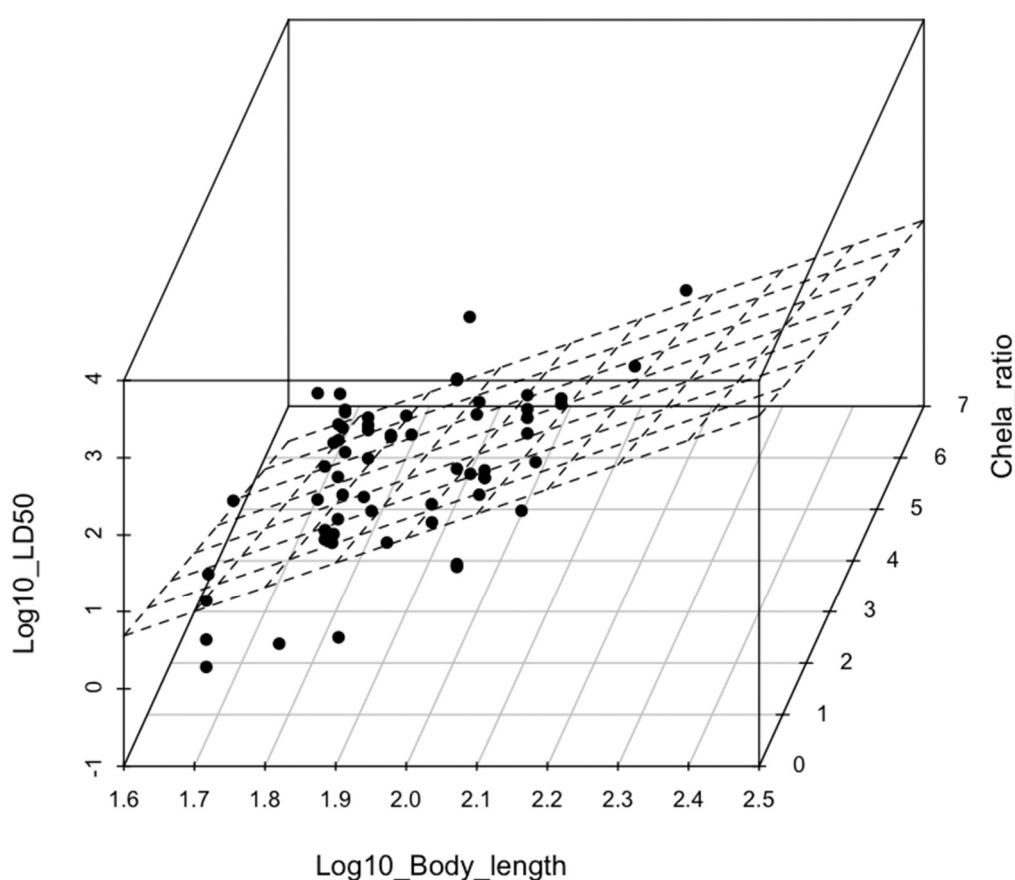

**Figure S1.** Three dimensional plot of the relationship between the two significant the independent effects of  $\text{log}_{10}$  transformed Body size and Chela ratio with  $\text{log}_{10}$  transformed  $\text{LD}_{50}$ . (for 62 observations for 36 species).

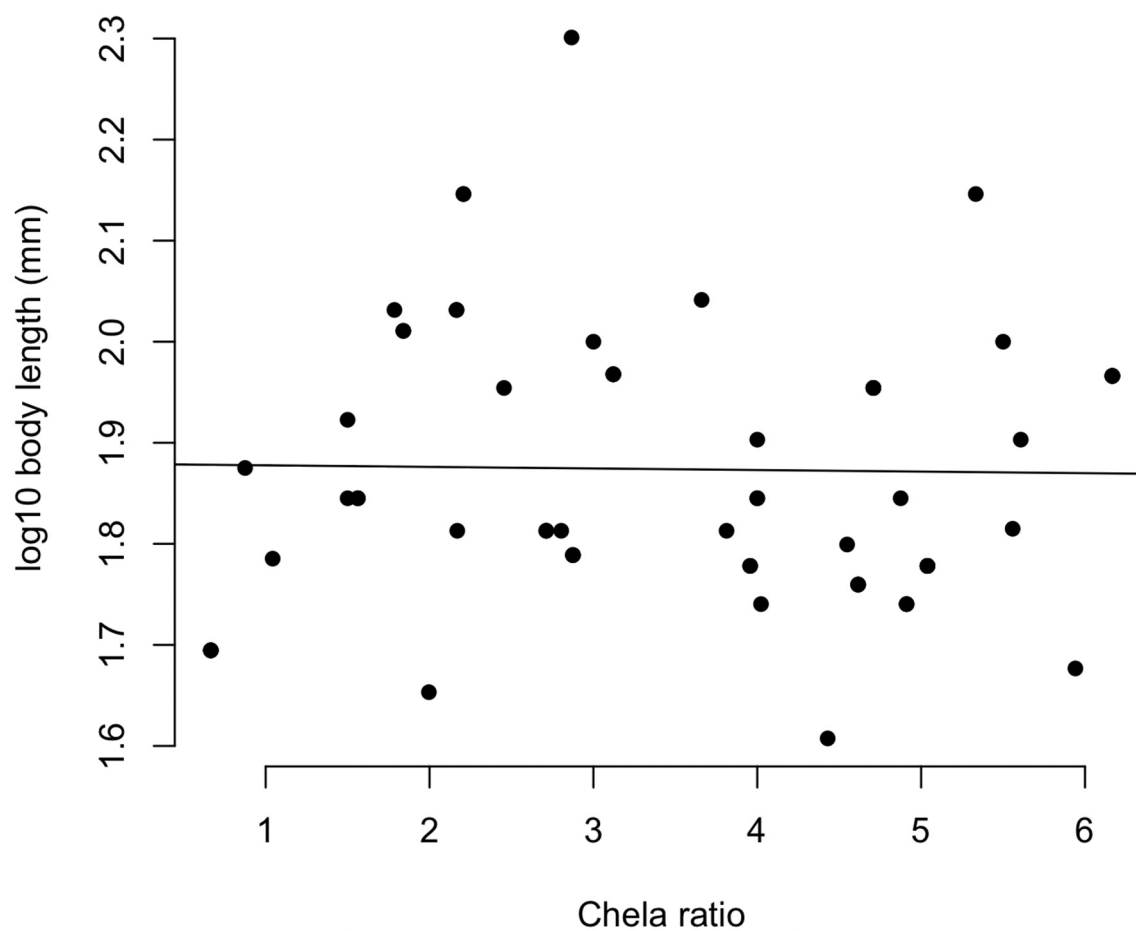

**Figure S2.** Relationship between Chela ratio and  $\log_{10}$  body length demonstrating no significant relationship between the variables ( Slope = -0.002,  $p = 0.89$  for 62 observations for 36 species).

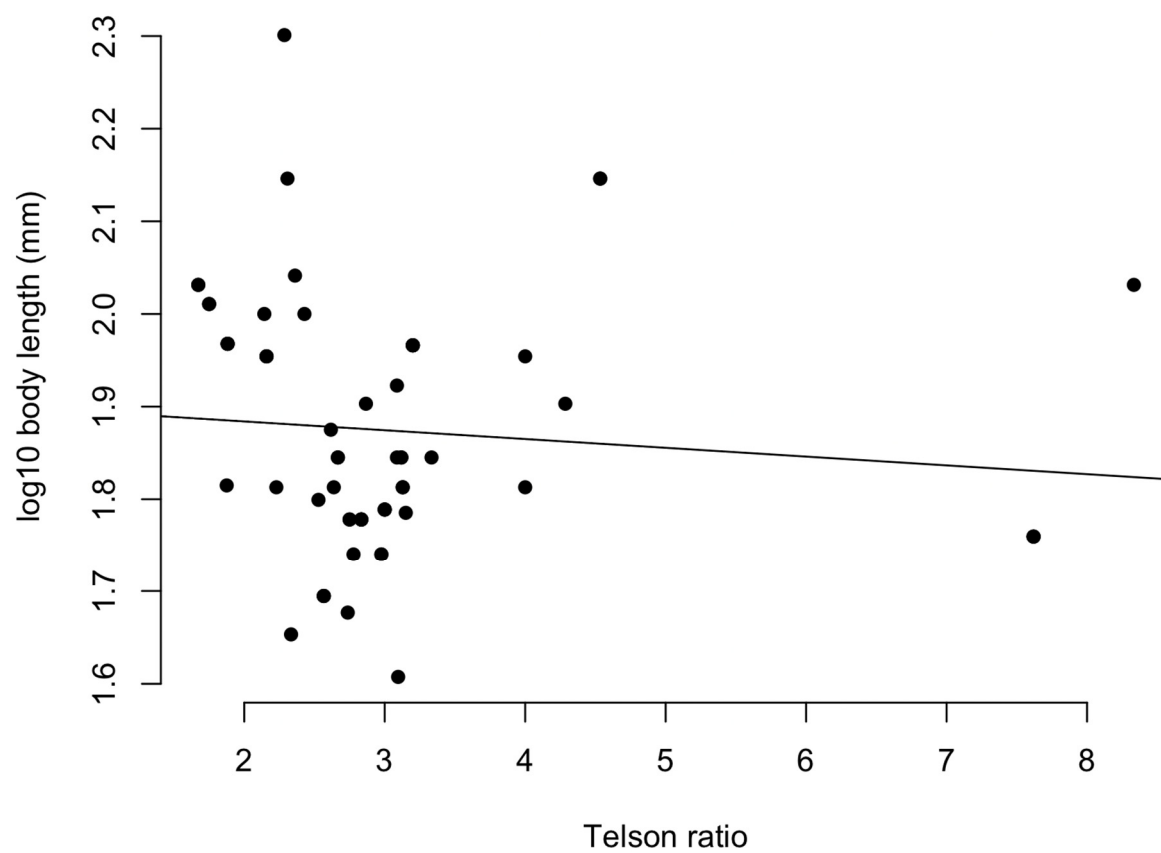

**Figure S3.** Relationship between Telson ratio and log<sub>10</sub> body length demonstrating no significant relationship between the variables (Slope = -0.01,  $p = 0.45$  for 62 observations for 36 species).
