# Supplementary material for: Scorpion Species with Smaller Body Sizes and Narrower Chelae Have the Highest Venom Potency
Source: Toxins (Basel). 2022 Mar 17;14(3):219. doi: 10.3390/toxins14030219 (PMC8951363; doi:10.3390/toxins14030219)
Supplement: Supplementary file 1 [file toxins-14-00219-s001.zip]

Archive with 4 entries (4 files):
- File S1_data.csv
- File S2_script.pdf
- File S3_phylogeny
- toxins-1605801 supplementary.pdf
