# Supplementary material for: Scorpion Species with Smaller Body Sizes and Narrower Chelae Have the Highest Venom Potency
Source: Toxins (Basel). 2022 Mar 17;14(3):219. doi: 10.3390/toxins14030219 (PMC8951363; doi:10.3390/toxins14030219)
Supplement: Supplementary file 1 [file toxins-14-00219-s001.zip › File S1_data.csv]

species	body_size_median_mm	body_size_median_mm_reference	telson_length_mm	telson_width_mm	telson_width_mm_reference	chela_length_mm	chela_width_mm	chela_width_mm_reference	ld50_mg_kg	ld50_method	LD50_reference
Androctonus_australis	92.85	Seiter, M.; Turiel, C. First record of Androctonus australis (Linnaeus, 1758) from Jordan (Scorpiones: Buthidae). Revista Ibérica de Aracnología 2013, 23, 95-98.	9.69	5.15	Seiter, M.; Turiel, C. First record of Androctonus australis (Linnaeus, 1758) from Jordan (Scorpiones: Buthidae). Revista Ibérica de Aracnología 2013, 23, 95-98.	16.7	5.35	Seiter, M.; Turiel, C. First record of Androctonus australis (Linnaeus, 1758) from Jordan (Scorpiones: Buthidae). Revista Ibérica de Aracnología 2013, 23, 95-98.	0.32	sc	Watt, D.D.; Simard, J.M. Neurotoxic proteins in scorpion venom. Journal of Toxicology: Toxin Reviews 1984, 3, 181-221.
Androctonus_australis	92.85	Seiter, M.; Turiel, C. First record of Androctonus australis (Linnaeus, 1758) from Jordan (Scorpiones: Buthidae). Revista Ibérica de Aracnología 2013, 23, 95-98.	9.69	5.15	Seiter, M.; Turiel, C. First record of Androctonus australis (Linnaeus, 1758) from Jordan (Scorpiones: Buthidae). Revista Ibérica de Aracnología 2013, 23, 95-98.	16.7	5.35	Seiter, M.; Turiel, C. First record of Androctonus australis (Linnaeus, 1758) from Jordan (Scorpiones: Buthidae). Revista Ibérica de Aracnología 2013, 23, 95-98.	0.35	sc	Zlotkin, E.; Fraenkel, G.; Miranda, F.; Lissitzky, S. The effect of scorpion venom on blowfly larvae—A new method for the evaluation of scorpion venoms potency. Toxicon 1971, 9, 1-2.
Androctonus_australis	92.85	Seiter, M.; Turiel, C. First record of Androctonus australis (Linnaeus, 1758) from Jordan (Scorpiones: Buthidae). Revista Ibérica de Aracnología 2013, 23, 95-98.	9.69	5.15	Seiter, M.; Turiel, C. First record of Androctonus australis (Linnaeus, 1758) from Jordan (Scorpiones: Buthidae). Revista Ibérica de Aracnología 2013, 23, 95-98.	16.7	5.35	Seiter, M.; Turiel, C. First record of Androctonus australis (Linnaeus, 1758) from Jordan (Scorpiones: Buthidae). Revista Ibérica de Aracnología 2013, 23, 95-98.	6	sc	Habermehl, G.G. Arthropoda. In Venomous Animals and Their Toxins; Springer: 1981; pp. 21-91.
Androctonus_crassicauda	90	OURENCO, W.R. Nouvelles considérations taxonomiques sur les espèces du genre Androctonus Ehrenberg, 1828 et description de deux nouvelles espèces (Scorpiones, Buthidae). Revue suisse de Zoologie 2005, 112, 145-171.	8.57	3.97	Karataş, A. and Kürtüllü, M., 2006. Duplication of pedipalp segments in the scorpion Androctonus crassicauda (Olivier, 1807). Euscorpius, 2006(43), pp.1-4.	11.3	2.4	Karataş, A. and Kürtüllü, M., 2006. Duplication of pedipalp segments in the scorpion Androctonus crassicauda (Olivier, 1807). Euscorpius, 2006(43), pp.1-4.	0.4	sc	Watt, D.D.; Simard, J.M. Neurotoxic proteins in scorpion venom. Journal of Toxicology: Toxin Reviews 1984, 3, 181-221.
Androctonus_crassicauda	90	OURENCO, W.R. Nouvelles considérations taxonomiques sur les espèces du genre Androctonus Ehrenberg, 1828 et description de deux nouvelles espèces (Scorpiones, Buthidae). Revue suisse de Zoologie 2005, 112, 145-171.	8.57	3.97	Karataş, A. and Kürtüllü, M., 2006. Duplication of pedipalp segments in the scorpion Androctonus crassicauda (Olivier, 1807). Euscorpius, 2006(43), pp.1-4.	11.3	2.4	Karataş, A. and Kürtüllü, M., 2006. Duplication of pedipalp segments in the scorpion Androctonus crassicauda (Olivier, 1807). Euscorpius, 2006(43), pp.1-4.	0.5	iv	Watt, D.D.; Simard, J.M. Neurotoxic proteins in scorpion venom. Journal of Toxicology: Toxin Reviews 1984, 3, 181-221.
Androctonus_crassicauda	90	OURENCO, W.R. Nouvelles considérations taxonomiques sur les espèces du genre Androctonus Ehrenberg, 1828 et description de deux nouvelles espèces (Scorpiones, Buthidae). Revue suisse de Zoologie 2005, 112, 145-171.	8.57	3.97	Karataş, A. and Kürtüllü, M., 2006. Duplication of pedipalp segments in the scorpion Androctonus crassicauda (Olivier, 1807). Euscorpius, 2006(43), pp.1-4.	11.3	2.4	Karataş, A. and Kürtüllü, M., 2006. Duplication of pedipalp segments in the scorpion Androctonus crassicauda (Olivier, 1807). Euscorpius, 2006(43), pp.1-4.	0.4	sc	Zlotkin, E.; Fraenkel, G.; Miranda, F.; Lissitzky, S. The effect of scorpion venom on blowfly larvae—A new method for the evaluation of scorpion venoms potency. Toxicon 1971, 9, 1-2.
Androctonus_amoreuxi	110	OURENCO, W.R. Nouvelles considérations taxonomiques sur les espèces du genre Androctonus Ehrenberg, 1828 et description de deux nouvelles espèces (Scorpiones, Buthidae). Revue suisse de Zoologie 2005, 112, 145-171.	11.24	4.76	Seiter, M.; Turiel, C. First record of Androctonus australis (Linnaeus, 1758) from Jordan (Scorpiones: Buthidae). Revista Ibérica de Aracnología 2013, 23, 95-98.	17.35	4.74	Seiter, M.; Turiel, C. First record of Androctonus australis (Linnaeus, 1758) from Jordan (Scorpiones: Buthidae). Revista Ibérica de Aracnología 2013, 23, 95-98.	0.75	sc	Zlotkin, E.; Fraenkel, G.; Miranda, F.; Lissitzky, S. The effect of scorpion venom on blowfly larvae—A new method for the evaluation of scorpion venoms potency. Toxicon 1971, 9, 1-2.
Androctonus_mauritanicus	80	OURENCO, W.R. Nouvelles considérations taxonomiques sur les espèces du genre Androctonus Ehrenberg, 1828 et description de deux nouvelles espèces (Scorpiones, Buthidae). Revue suisse de Zoologie 2005, 112, 145-171.	7.5	1.75	Georg L, 2011 <https://www.ntnu.no/ub/scorpion-files/a_mauritanicus(f)_anatomypictures.pdf>	11.2	2.8	Georg L, 2011 <https://www.ntnu.no/ub/scorpion-files/a_mauritanicus(f)_anatomypictures.pdf>	0.315	sc	Zlotkin, E.; Fraenkel, G.; Miranda, F.; Lissitzky, S. The effect of scorpion venom on blowfly larvae—A new method for the evaluation of scorpion venoms potency. Toxicon 1971, 9, 1-2.
Androctonus_bicolor	75	OURENCO, W.R. Nouvelles considérations taxonomiques sur les espèces du genre Androctonus Ehrenberg, 1828 et description de deux nouvelles espèces (Scorpiones, Buthidae). Revue suisse de Zoologie 2005, 112, 145-171.	7.85	3	Teruel, R.; Kovařík, F. Redescription of Androctonus bicolor Ehrenberg, 1828, and Description of Androctonus turieli sp. n. from Tunisia (Scorpiones: Buthidae). Euscorpius 2014, 1-15.	5.64	6.45	Teruel, R.; Kovařík, F. Redescription of Androctonus bicolor Ehrenberg, 1828, and Description of Androctonus turieli sp. n. from Tunisia (Scorpiones: Buthidae). Euscorpius 2014, 1-15.	1.21	iv	Tu, A.T. Handbook of Natural Toxins: Insect poisons, allergens, and other invertebrate venoms. In Handbook of Natural Toxins: Insect poisons, allergens, and other invertebrate venoms; 1984
Buthus_occitanus	65	Lourenco, W.R. Compléments à la faune de scorpions (Arachnida) de l'Afrique du Nord, avec des considérations sur le genre Buthus Leach, 1815. Revue suisse de Zoologie 2003, 110, 875-912.	7.8	3.5	Lourenço, W.R.; Cloudsley-Thompson, J.L. A new species of Buthus Leach, 1815 from Egypt (Scorpiones, Buthidae). Entomologische Mitteilungen aus dem Zoologischen Museum Hamburg 2012, 16, 11-18.	12.2	3.2	Lourenço, W.R.; Cloudsley-Thompson, J.L. A new species of Buthus Leach, 1815 from Egypt (Scorpiones, Buthidae). Entomologische Mitteilungen aus dem Zoologischen Museum Hamburg 2012, 16, 11-18.	0.895	sc	Zlotkin, E.; Fraenkel, G.; Miranda, F.; Lissitzky, S. The effect of scorpion venom on blowfly larvae—A new method for the evaluation of scorpion venoms potency. Toxicon 1971, 9, 1-2.
Buthus_occitanus	65	Lourenco, W.R. Compléments à la faune de scorpions (Arachnida) de l'Afrique du Nord, avec des considérations sur le genre Buthus Leach, 1815. Revue suisse de Zoologie 2003, 110, 875-912.	11.2	2.8	Kovařík, F. Review of Tunisian species of the genus Buthus with descriptions of two new species and a discussion of Ehrenberg’s types (Scorpiones: Buthidae). Euscorpius 2006, 2006, 1-16.	7.05	3.25	Kovařík, F. Review of Tunisian species of the genus Buthus with descriptions of two new species and a discussion of Ehrenberg’s types (Scorpiones: Buthidae). Euscorpius 2006, 2006, 1-16.	4.15	sc	Zlotkin, E.; Fraenkel, G.; Miranda, F.; Lissitzky, S. The effect of scorpion venom on blowfly larvae—A new method for the evaluation of scorpion venoms potency. Toxicon 1971, 9, 1-2.
Buthus_occitanus	55	Lourenco, W.R. Compléments à la faune de scorpions (Arachnida) de l'Afrique du Nord, avec des considérations sur le genre Buthus Leach, 1815. Revue suisse de Zoologie 2003, 110, 875-912.	11.16	3.75	Lourenço, W.R.; Rossi, A. SICILY (SCORPIONES, BUTHIDAE). BIOGEOGRAPHICAL IMPLICATIONS.	11.05	2.25	Lourenço, W.R.; Rossi, A. SICILY (SCORPIONES, BUTHIDAE). BIOGEOGRAPHICAL IMPLICATIONS.	0.9	sc	Tu, A.T. Handbook of Natural Toxins: Insect poisons, allergens, and other invertebrate venoms. In Handbook of Natural Toxins: Insect poisons, allergens, and other invertebrate venoms; 1984
Buthus_occitanus	55	Lourenco, W.R. Compléments à la faune de scorpions (Arachnida) de l'Afrique du Nord, avec des considérations sur le genre Buthus Leach, 1815. Revue suisse de Zoologie 2003, 110, 875-912.	11.16	3.75	Lourenço, W.R.; Rossi, A. SICILY (SCORPIONES, BUTHIDAE). BIOGEOGRAPHICAL IMPLICATIONS.	11.05	2.25	Lourenço, W.R.; Rossi, A. SICILY (SCORPIONES, BUTHIDAE). BIOGEOGRAPHICAL IMPLICATIONS.	1.44	iv	Zlotkin, E.; Fraenkel, G.; Miranda, F.; Lissitzky, S. The effect of scorpion venom on blowfly larvae—A new method for the evaluation of scorpion venoms potency. Toxicon 1971, 9, 1-2.
Buthiscus_bicalcaratus	55	Aboshaala, F.; Badry, A.; Sadine, S.E. Ecological considerations on Buthiscus bicalcaratus Birula, 1905 with a new locality in northern Libya (Scorpiones, Buthidae). Archives de l’Institut Pasteur d’Algérie 2020, 15, 97-101.	5	1.8	Rein, J. O. 2017. The Scorpion Files. Trondheim: Norwegian University of Science and Technology. [Accessed 2017.01.23] <https://www.ntnu.no/ub/scorpion-files/b_bicalcaratus.jpg>	8.85	2.2	Rein, J. O. 2017. The Scorpion Files. Trondheim: Norwegian University of Science and Technology. [Accessed 2017.01.23] <https://www.ntnu.no/ub/scorpion-files/b_bicalcaratus.jpg>	0.6	sc	Zlotkin, E.; Fraenkel, G.; Miranda, F.; Lissitzky, S. The effect of scorpion venom on blowfly larvae—A new method for the evaluation of scorpion venoms potency. Toxicon 1971, 9, 1-2.
Buthacus_leptochelys	60	Kovařík, F. Taxonomic position of species of the genus Buthacus Birula, 1908 described by Ehrenberg and Lourenço, and description of a new species (Scorpiones: Buthidae). Euscorpius 2005, 2005, 1-13.	5.5	2	Lourenço, W.R.; Rossi, A. SICILY (SCORPIONES, BUTHIDAE). BIOGEOGRAPHICAL IMPLICATIONS.	9.1	2.3	Lourenço, W.R.; Rossi, A. SICILY (SCORPIONES, BUTHIDAE). BIOGEOGRAPHICAL IMPLICATIONS.	0.765	sc	Zlotkin, E.; Fraenkel, G.; Miranda, F.; Lissitzky, S. The effect of scorpion venom on blowfly larvae—A new method for the evaluation of scorpion venoms potency. Toxicon 1971, 9, 1-2.
Buthacus_leptochelys	60	Kovařík, F. Taxonomic position of species of the genus Buthacus Birula, 1908 described by Ehrenberg and Lourenço, and description of a new species (Scorpiones: Buthidae). Euscorpius 2005, 2005, 1-13.	5.5	2	Lourenço, W.R.; Rossi, A. SICILY (SCORPIONES, BUTHIDAE). BIOGEOGRAPHICAL IMPLICATIONS.	9.1	2.3	Lourenço, W.R.; Rossi, A. SICILY (SCORPIONES, BUTHIDAE). BIOGEOGRAPHICAL IMPLICATIONS.	5.62	iv	Tu, A.T. Handbook of Natural Toxins: Insect poisons, allergens, and other invertebrate venoms. In Handbook of Natural Toxins: Insect poisons, allergens, and other invertebrate venoms; 1984
Buthacus_arenicola	57.5	Salama, W.M.; Sharshar, K.M. Surveillance study on scorpion species in Egypt and comparison of their crude venom protein profiles. The Journal of Basic & Applied Zoology 2013, 66, 76-86.	16	2.1	Lourenço, W.R. Further considerations on the genus Buthacus Birula, 1908. Boletín Sociedad Entomológica Aragonesa 2006, 1, 59-70.	9	1.95	Lourenço, W.R. Further considerations on the genus Buthacus Birula, 1908. Boletín Sociedad Entomológica Aragonesa 2006, 1, 59-70.	3.5	sc	Habermehl, G.G. Arthropoda. In Venomous Animals and Their Toxins; Springer: 1981; pp. 21-91.
Buthacus_arenicola	57.5	Salama, W.M.; Sharshar, K.M. Surveillance study on scorpion species in Egypt and comparison of their crude venom protein profiles. The Journal of Basic & Applied Zoology 2013, 66, 76-86.	16	2.1	Lourenço, W.R. Further considerations on the genus Buthacus Birula, 1908. Boletín Sociedad Entomológica Aragonesa 2006, 1, 59-70.	9	1.95	Lourenço, W.R. Further considerations on the genus Buthacus Birula, 1908. Boletín Sociedad Entomológica Aragonesa 2006, 1, 59-70.	0.99	sc	Zlotkin, E.; Fraenkel, G.; Miranda, F.; Lissitzky, S. The effect of scorpion venom on blowfly larvae—A new method for the evaluation of scorpion venoms potency. Toxicon 1971, 9, 1-2.
Buthacus_arenicola	57.5	Salama, W.M.; Sharshar, K.M. Surveillance study on scorpion species in Egypt and comparison of their crude venom protein profiles. The Journal of Basic & Applied Zoology 2013, 66, 76-86.	16	2.1	Lourenço, W.R. Further considerations on the genus Buthacus Birula, 1908. Boletín Sociedad Entomológica Aragonesa 2006, 1, 59-70.	9	1.95	Lourenço, W.R. Further considerations on the genus Buthacus Birula, 1908. Boletín Sociedad Entomológica Aragonesa 2006, 1, 59-70.	3.25	iv	Tu, A.T. Handbook of Natural Toxins: Insect poisons, allergens, and other invertebrate venoms. In Handbook of Natural Toxins: Insect poisons, allergens, and other invertebrate venoms; 1984
Hottentotta_minax	70	King, H. Notes on Sudan scorpions. Sudan Notes and Records 1925, 8, 79-84.	11.6	3.72	Lourenço, W.R., 2004. On the genus Hottentotta Birula 1908, with the description of a new species from Chad (Scorpiones: Buthidae). Entomol. Mitt. Zool. Mus. Hamburg, 14(170), pp.211-218.	12.4	3.1	Lourenço, W.R., 2004. On the genus Hottentotta Birula 1908, with the description of a new species from Chad (Scorpiones: Buthidae). Entomol. Mitt. Zool. Mus. Hamburg, 14(170), pp.211-218.	4.25	sc	Zlotkin, E.; Fraenkel, G.; Miranda, F.; Lissitzky, S. The effect of scorpion venom on blowfly larvae—A new method for the evaluation of scorpion venoms potency. Toxicon 1971, 9, 1-2.
Hottentotta_minax	70	King, H. Notes on Sudan scorpions. Sudan Notes and Records 1925, 8, 79-84.	11.6	3.72	Lourenço, W.R., 2004. On the genus Hottentotta Birula 1908, with the description of a new species from Chad (Scorpiones: Buthidae). Entomol. Mitt. Zool. Mus. Hamburg, 14(170), pp.211-218.	12.4	3.1	Lourenço, W.R., 2004. On the genus Hottentotta Birula 1908, with the description of a new species from Chad (Scorpiones: Buthidae). Entomol. Mitt. Zool. Mus. Hamburg, 14(170), pp.211-218.	4	im	El-Asmar, M.; Ismail, M.; Osman, O. Immunological studies of scorpion (Buthus minax, L. Koch) venom. Toxicon 1973, 11, 9-14.
Centruroides_limpidus	49.5	de Armas, L.F.; Martín-Frías, E. El género" Centruroides" Marx, 1890 (Scorpiones: Buthidae) en el estado de Veracruz, México. Boletín de la SEA 2008, 7-22.	4.26	1.66	de Armas, L.F.; Martín-Frías, E. El género" Centruroides" Marx, 1890 (Scorpiones: Buthidae) en el estado de Veracruz, México. Boletín de la SEA 2008, 7-22.	3.16	4.75	de Armas, L.F.; Martín-Frías, E. El género" Centruroides" Marx, 1890 (Scorpiones: Buthidae) en el estado de Veracruz, México. Boletín de la SEA 2008, 7-22.	0.69	sc	Tu, A.T. Handbook of Natural Toxins: Insect poisons, allergens, and other invertebrate venoms. In Handbook of Natural Toxins: Insect poisons, allergens, and other invertebrate venoms; 1984
Centruroides_limpidus	49.5	de Armas, L.F.; Martín-Frías, E. El género" Centruroides" Marx, 1890 (Scorpiones: Buthidae) en el estado de Veracruz, México. Boletín de la SEA 2008, 7-22.	4.26	1.66	de Armas, L.F.; Martín-Frías, E. El género" Centruroides" Marx, 1890 (Scorpiones: Buthidae) en el estado de Veracruz, México. Boletín de la SEA 2008, 7-22.	3.16	4.75	de Armas, L.F.; Martín-Frías, E. El género" Centruroides" Marx, 1890 (Scorpiones: Buthidae) en el estado de Veracruz, México. Boletín de la SEA 2008, 7-22.	1.56	iv	Zlotkin, E.; Martinez, G.; Rochat, H.; Miranda, F. A protein from scorpion venom toxic to crustaceans. Animal Plant and Microbial Toxins 1976, 1, 73-80.
Centruroides_limpidus	49.5	de Armas, L.F.; Martín-Frías, E. El género" Centruroides" Marx, 1890 (Scorpiones: Buthidae) en el estado de Veracruz, México. Boletín de la SEA 2008, 7-22.	4.26	1.66	de Armas, L.F.; Martín-Frías, E. El género" Centruroides" Marx, 1890 (Scorpiones: Buthidae) en el estado de Veracruz, México. Boletín de la SEA 2008, 7-22.	3.16	4.75	de Armas, L.F.; Martín-Frías, E. El género" Centruroides" Marx, 1890 (Scorpiones: Buthidae) en el estado de Veracruz, México. Boletín de la SEA 2008, 7-22.	5	sc	Habermehl, G.G. Arthropoda. In Venomous Animals and Their Toxins; Springer: 1981; pp. 21-91.
Centruroides_tecomanus	65.3	Quijano-Ravell, A.F.; Ponce-Saavedra, J. A new species of scorpion of the genus Centruroides (Scorpiones: Buthidae) from the state of Michoacán, Mexico. Revista mexicana de biodiversidad 2016, 87, 49-61.	3.75	2	González-Santillán, E.; Galán-Sánchez, M.A.; Valdez-Velázquez, L.L. A new species of Centruroides (Scorpiones, Buthidae) from Colima, Mexico. Comptes Rendus Biologies 2019, 342, 331-344.	6.67	1.2	González-Santillán, E.; Galán-Sánchez, M.A.; Valdez-Velázquez, L.L. A new species of Centruroides (Scorpiones, Buthidae) from Colima, Mexico. Comptes Rendus Biologies 2019, 342, 331-344.	0.69	sc	Zlotkin, E.; Fraenkel, G.; Miranda, F.; Lissitzky, S. The effect of scorpion venom on blowfly larvae—A new method for the evaluation of scorpion venoms potency. Toxicon 1971, 9, 1-2.
Centruroides_noxius	40.5	Teruel, R.; Ponce-Saavedra, J.; Quijano-Ravell, A.F. Redescription of Centruroides noxius and description of a closely related new species from western Mexico (Scorpiones: Buthidae). Revista mexicana de biodiversidad 2015, 86, 896-911.	4.365	1.41	Teruel, R.; Ponce-Saavedra, J.; Quijano-Ravell, A.F. Redescription of Centruroides noxius and description of a closely related new species from western Mexico (Scorpiones: Buthidae). Revista mexicana de biodiversidad 2015, 86, 896-911.	6.29	1.42	Teruel, R.; Ponce-Saavedra, J.; Quijano-Ravell, A.F. Redescription of Centruroides noxius and description of a closely related new species from western Mexico (Scorpiones: Buthidae). Revista mexicana de biodiversidad 2015, 86, 896-911.	0.31	iv	Tu, A.T. Handbook of Natural Toxins: Insect poisons, allergens, and other invertebrate venoms. In Handbook of Natural Toxins: Insect poisons, allergens, and other invertebrate venoms; 1984
Centruroides_sculpturatus	70	Iowa State University, 2022 <https://bugguide.net/node/view/1651680>	5	1.5	Iowa State University, 2022 <https://bugguide.net/node/view/1651680>	9.75	2	Iowa State University, 2022 <https://bugguide.net/node/view/1651680>	1.12	iv	Whittemore Jr, F.; Keegan, H.; Borowitz, J. Studies of scorpion antivenins: 1. Paraspecificity. Bulletin of the World Health Organization 1961, 25, 185.
Compsobuthus_acutecarinatus	47.5	Lourenço, W.R.; Leguin, E.-A.; Duhem, B. Notes on the type material of Compsobuthus acutecarinatus (Simon, 1882) and C. maindroni (Kraepelin, 1900), and description of a new species from United Arab Emirates: (Scorpiones: Buthidae). Zoology in the Middle East 2010, 50, 119-126.	5.2	1.9	Lourenço, W.R.; Leguin, E.-A.; Duhem, B. Notes on the type material of Compsobuthus acutecarinatus (Simon, 1882) and C. maindroni (Kraepelin, 1900), and description of a new species from United Arab Emirates: (Scorpiones: Buthidae). Zoology in the Middle East 2010, 50, 119-126.	10.1	1.7	Lourenço, W.R.; Leguin, E.-A.; Duhem, B. Notes on the type material of Compsobuthus acutecarinatus (Simon, 1882) and C. maindroni (Kraepelin, 1900), and description of a new species from United Arab Emirates: (Scorpiones: Buthidae). Zoology in the Middle East 2010, 50, 119-126.	0.75	iv	Tu, A.T. Handbook of Natural Toxins: Insect poisons, allergens, and other invertebrate venoms. In Handbook of Natural Toxins: Insect poisons, allergens, and other invertebrate venoms; 1984
Hadrurus_arizonensis	140	Fox, G.A.; Cooper, A.M.; Hayes, W.K. The dilemma of choosing a reference character for measuring sexual size dimorphism, sexual body component dimorphism, and character scaling: cryptic dimorphism and allometry in the scorpion Hadrurus arizonensis. PLoS One 2015, 10, e0120392.	19.95	4.4	Fox, G.A.; Cooper, A.M.; Hayes, W.K. The dilemma of choosing a reference character for measuring sexual size dimorphism, sexual body component dimorphism, and character scaling: cryptic dimorphism and allometry in the scorpion Hadrurus arizonensis. PLoS One 2015, 10, e0120392.	12.8	5.8	Fox, G.A.; Cooper, A.M.; Hayes, W.K. The dilemma of choosing a reference character for measuring sexual size dimorphism, sexual body component dimorphism, and character scaling: cryptic dimorphism and allometry in the scorpion Hadrurus arizonensis. PLoS One 2015, 10, e0120392.	198	sc	Zlotkin E., Miranda F., Rochat H. Venoms of Buthinae: C. Chemistry and pharmacology of Buthinae scorpion venoms. Handbook of Experimental Pharmacology, Vol. 48, Arthropod-Venoms, S. Bettini. Springer-Verlag, Berlin, New York 1978; 317–369
Hadrurus_arizonensis	140	Fox, G.A.; Cooper, A.M.; Hayes, W.K. The dilemma of choosing a reference character for measuring sexual size dimorphism, sexual body component dimorphism, and character scaling: cryptic dimorphism and allometry in the scorpion Hadrurus arizonensis. PLoS One 2015, 10, e0120392.	19.95	4.4	Fox, G.A.; Cooper, A.M.; Hayes, W.K. The dilemma of choosing a reference character for measuring sexual size dimorphism, sexual body component dimorphism, and character scaling: cryptic dimorphism and allometry in the scorpion Hadrurus arizonensis. PLoS One 2015, 10, e0120392.	12.8	5.8	Fox, G.A.; Cooper, A.M.; Hayes, W.K. The dilemma of choosing a reference character for measuring sexual size dimorphism, sexual body component dimorphism, and character scaling: cryptic dimorphism and allometry in the scorpion Hadrurus arizonensis. PLoS One 2015, 10, e0120392.	168	ip	Zlotkin E., Miranda F., Rochat H. Venoms of Buthinae: C. Chemistry and pharmacology of Buthinae scorpion venoms. Handbook of Experimental Pharmacology, Vol. 48, Arthropod-Venoms, S. Bettini. Springer-Verlag, Berlin, New York 1978; 317–370
Hadogenes_troglodytes	200	Punzo, F., 1999. Desert arthropods: life history variations. Springer Science & Business Media.	8	3.5	Punzo, F., 1999. Desert arthropods: life history variations. Springer Science & Business Media.	43	15	Punzo, F., 1999. Desert arthropods: life history variations. Springer Science & Business Media.	1800	sc	Habermehl, G.G. Arthropoda. In Venomous Animals and Their Toxins; Springer: 1981; pp. 21-91.
Hottentotta_judaicus	70	Kovařík, F. A revision of the genus Hottentotta Birula, 1908, with descriptions of four new species (Scorpiones, Buthidae). Euscorpius 2007, 2007, 1-107.	10.65	3.45	Kovařík, F. A revision of the genus Hottentotta Birula, 1908, with descriptions of four new species (Scorpiones, Buthidae). Euscorpius 2007, 2007, 1-107.	5.85	3.9	Kovařík, F. A revision of the genus Hottentotta Birula, 1908, with descriptions of four new species (Scorpiones, Buthidae). Euscorpius 2007, 2007, 1-107.	7.94	iv	Tu, A.T. Handbook of Natural Toxins: Insect poisons, allergens, and other invertebrate venoms. In Handbook of Natural Toxins: Insect poisons, allergens, and other invertebrate venoms; 1984
Hemiscorpius_lepturus	90	Pipelzadeh, M.H.; Jalali, A.; Taraz, M.; Pourabbas, R.; Zaremirakabadi, A. An epidemiological and a clinical study on scorpionism by the Iranian scorpion Hemiscorpius lepturus. Toxicon 2007, 50, 984-992.	8	2	Monod, L.; Lourenco, W.R. Hemiscorpiidae (Scorpiones) from Iran, with descriptions of two new species and notes on biogeography and phylogenetic relationships. Revue suisse de Zoologie 2005, 112, 869-942.	10.8	4.4	Monod, L.; Lourenco, W.R. Hemiscorpiidae (Scorpiones) from Iran, with descriptions of two new species and notes on biogeography and phylogenetic relationships. Revue suisse de Zoologie 2005, 112, 869-942.	5.81	iv	Tu, A.T. Handbook of Natural Toxins: Insect poisons, allergens, and other invertebrate venoms. In Handbook of Natural Toxins: Insect poisons, allergens, and other invertebrate venoms; 1985
Leiurus_quinquestriatus	92.5	Salama, W.M.; Sharshar, K.M. Surveillance study on scorpion species in Egypt and comparison of their crude venom protein profiles. The Journal of Basic & Applied Zoology 2013, 66, 76-86.	16	5	Salama, W.M.; Sharshar, K.M. Surveillance study on scorpion species in Egypt and comparison of their crude venom protein profiles. The Journal of Basic & Applied Zoology 2013, 66, 76-86.	18.5	3	Salama, W.M.; Sharshar, K.M. Surveillance study on scorpion species in Egypt and comparison of their crude venom protein profiles. The Journal of Basic & Applied Zoology 2013, 66, 76-86.	0.255	sc	Zlotkin, E.; Fraenkel, G.; Miranda, F.; Lissitzky, S. The effect of scorpion venom on blowfly larvae—A new method for the evaluation of scorpion venoms potency. Toxicon 1971, 9, 1-2.
Leiurus_quinquestriatus	92.5	Salama, W.M.; Sharshar, K.M. Surveillance study on scorpion species in Egypt and comparison of their crude venom protein profiles. The Journal of Basic & Applied Zoology 2013, 66, 76-86.	16	5	Salama, W.M.; Sharshar, K.M. Surveillance study on scorpion species in Egypt and comparison of their crude venom protein profiles. The Journal of Basic & Applied Zoology 2013, 66, 76-86.	18.5	3	Salama, W.M.; Sharshar, K.M. Surveillance study on scorpion species in Egypt and comparison of their crude venom protein profiles. The Journal of Basic & Applied Zoology 2013, 66, 76-86.	0.33	sc	Habermehl, G.G. Arthropoda. In Venomous Animals and Their Toxins; Springer: 1981; pp. 21-91.
Leiurus_quinquestriatus	92.5	Salama, W.M.; Sharshar, K.M. Surveillance study on scorpion species in Egypt and comparison of their crude venom protein profiles. The Journal of Basic & Applied Zoology 2013, 66, 76-86.	16	5	Salama, W.M.; Sharshar, K.M. Surveillance study on scorpion species in Egypt and comparison of their crude venom protein profiles. The Journal of Basic & Applied Zoology 2013, 66, 76-86.	18.5	3	Salama, W.M.; Sharshar, K.M. Surveillance study on scorpion species in Egypt and comparison of their crude venom protein profiles. The Journal of Basic & Applied Zoology 2013, 66, 76-86.	0.16	sc	Tu, A.T. Handbook of Natural Toxins: Insect poisons, allergens, and other invertebrate venoms. In Handbook of Natural Toxins: Insect poisons, allergens, and other invertebrate venoms; 1984
Leiurus_quinquestriatus	92.5	Salama, W.M.; Sharshar, K.M. Surveillance study on scorpion species in Egypt and comparison of their crude venom protein profiles. The Journal of Basic & Applied Zoology 2013, 66, 76-86.	16	5	Salama, W.M.; Sharshar, K.M. Surveillance study on scorpion species in Egypt and comparison of their crude venom protein profiles. The Journal of Basic & Applied Zoology 2013, 66, 76-86.	18.5	3	Salama, W.M.; Sharshar, K.M. Surveillance study on scorpion species in Egypt and comparison of their crude venom protein profiles. The Journal of Basic & Applied Zoology 2013, 66, 76-86.	0.5	iv	Zlotkin, E.; Martinez, G.; Rochat, H.; Miranda, F. A protein from scorpion venom toxic to crustaceans. Animal Plant and Microbial Toxins 1976, 1, 73-80.
Mesobuthus_eupeus	45	King, H. Notes on Sudan scorpions. Sudan Notes and Records 1925, 8, 79-84.	4.97	2.13	Kovařík, F.; Yağmur, E.A.; Fet, V.; Navidpour, S. On two subspecies of Mesobuthus eupeus (CL Koch, 1839) in Turkey (Scorpiones: Buthidae). Euscorpius 2011, 2011, 1-15.	4.97	2.49	Kovařík, F.; Yağmur, E.A.; Fet, V.; Navidpour, S. On two subspecies of Mesobuthus eupeus (CL Koch, 1839) in Turkey (Scorpiones: Buthidae). Euscorpius 2011, 2011, 1-15.	1.45	iv	Tu, A.T. Handbook of Natural Toxins: Insect poisons, allergens, and other invertebrate venoms. In Handbook of Natural Toxins: Insect poisons, allergens, and other invertebrate venoms; 1984
Opistophthalmus_glabrifrons	102.5	Georg L, 2011 <https://scorpiones.pl/gallery/anatomy-by-georg/Anatomy%20of%20Opistophthalmus%20glabrifrons%20(female).pdf>	7	4	Georg L, 2011 <https://scorpiones.pl/gallery/anatomy-by-georg/Anatomy%20of%20Opistophthalmus%20glabrifrons%20(female).pdf>	23	12.5	Georg L, 2011 <https://scorpiones.pl/gallery/anatomy-by-georg/Anatomy%20of%20Opistophthalmus%20glabrifrons%20(female).pdf>	625	iv	Tu, A.T. Handbook of Natural Toxins: Insect poisons, allergens, and other invertebrate venoms. In Handbook of Natural Toxins: Insect poisons, allergens, and other invertebrate venoms; 1985
Opistophthalmus_glabrifrons	102.5	Georg L, 2011 <https://scorpiones.pl/gallery/anatomy-by-georg/Anatomy%20of%20Opistophthalmus%20glabrifrons%20(female).pdf>	7	4	Georg L, 2011 <https://scorpiones.pl/gallery/anatomy-by-georg/Anatomy%20of%20Opistophthalmus%20glabrifrons%20(female).pdf>	23	12.5	Georg L, 2011 <https://scorpiones.pl/gallery/anatomy-by-georg/Anatomy%20of%20Opistophthalmus%20glabrifrons%20(female).pdf>	600	sc	Habermehl, G.G. Arthropoda. In Venomous Animals and Their Toxins; Springer: 1981; pp. 21-91.
Odontobuthus_doriae	100	Dehghani, R.; Kassiri, H. Geographical distribution of scorpion odontobuthus doriae in Isfahan province, central Iran. Journal of arthropod-borne diseases 2017, 11,	8.5	3.5	Mozaffari, E.; Sedaghat, M.M.; Dehkordi, A.S.; Akbarzadeh, K. Bidiversity and species composition of scorpions (Arachnida, Scorpiones) in Ilam County, Iran. Journal of Applied Sciences Research 2013, 9, 5412-5418.	16.5	3	Mozaffari, E.; Sedaghat, M.M.; Dehkordi, A.S.; Akbarzadeh, K. Bidiversity and species composition of scorpions (Arachnida, Scorpiones) in Ilam County, Iran. Journal of Applied Sciences Research 2013, 9, 5412-5418.	0.19	iv	Tu, A.T. Handbook of Natural Toxins: Insect poisons, allergens, and other invertebrate venoms. In Handbook of Natural Toxins: Insect poisons, allergens, and other invertebrate venoms; 1984
Parabuthus_transvaalicus	140	Prendini, L. The systematics of southern African Parabuthus Pocock (Scorpiones, Buthidae): revisions to the taxonomy and key to the species. The Journal of Arachnology 2004, 32, 109-187.	15	6.5	All scorpion Archive; January 2013; <https://allscorpionarchives.forumotion.com/t515-gravid-or-premolt-to-8i-parabuthus-transvaalicus>	16	3	All scorpion Archive; January 2013; <https://allscorpionarchives.forumotion.com/t515-gravid-or-premolt-to-8i-parabuthus-transvaalicus>	4.25	sc	Zlotkin, E.; Martinez, G.; Rochat, H.; Miranda, F. A protein from scorpion venom toxic to crustaceans. Animal Plant and Microbial Toxins 1976, 1, 73-80.
Pandinus_exitialis	107.5	Kovařík, F.; Lowe, G.; Mazuch, T.; Awale, A.I.; Štundlová, J.; Šťáhlavský, F. Scorpions of the Horn of Africa (Arachnida: Scorpiones). Part XII. Pandinurus hangarale sp. n.(Scorpionidae) from Somaliland and a review of type locality and true distribution of Pandinurus smithi (Pocock, 1897). Euscorpius 2017, 1-18.	10	1.2	Kovařík, F.; Lowe, G.; Mazuch, T.; Awale, A.I.; Štundlová, J.; Šťáhlavský, F. Scorpions of the Horn of Africa (Arachnida: Scorpiones). Part XII. Pandinurus hangarale sp. n.(Scorpionidae) from Somaliland and a review of type locality and true distribution of Pandinurus smithi (Pocock, 1897). Euscorpius 2017, 1-18.	20	11.2	Kovařík, F.; Lowe, G.; Mazuch, T.; Awale, A.I.; Štundlová, J.; Šťáhlavský, F. Scorpions of the Horn of Africa (Arachnida: Scorpiones). Part XII. Pandinurus hangarale sp. n.(Scorpionidae) from Somaliland and a review of type locality and true distribution of Pandinurus smithi (Pocock, 1897). Euscorpius 2017, 1-18.	40	sc	Ismall, M.; Osman, O.; Gumaa, K.; Karrar, M. Some pharmacological studies with scorpion (Pandinus exitialis) venom. Toxicon 1974, 12, 75-78.
Scorpio_maurus	70	Salama, W.M.; Sharshar, K.M. Surveillance study on scorpion species in Egypt and comparison of their crude venom protein profiles. The Journal of Basic & Applied Zoology 2013, 66, 76-86.	16	6	Salama, W.M.; Sharshar, K.M. Surveillance study on scorpion species in Egypt and comparison of their crude venom protein profiles. The Journal of Basic & Applied Zoology 2013, 66, 76-86.	12.5	8	Salama, W.M.; Sharshar, K.M. Surveillance study on scorpion species in Egypt and comparison of their crude venom protein profiles. The Journal of Basic & Applied Zoology 2013, 66, 76-86.	9.37	iv	Tu, A.T. Handbook of Natural Toxins: Insect poisons, allergens, and other invertebrate venoms. In Handbook of Natural Toxins: Insect poisons, allergens, and other invertebrate venoms; 1984
Scorpio_maurus	70	Salama, W.M.; Sharshar, K.M. Surveillance study on scorpion species in Egypt and comparison of their crude venom protein profiles. The Journal of Basic & Applied Zoology 2013, 66, 76-86.	16	6	Salama, W.M.; Sharshar, K.M. Surveillance study on scorpion species in Egypt and comparison of their crude venom protein profiles. The Journal of Basic & Applied Zoology 2013, 66, 76-86.	12.5	8	Salama, W.M.; Sharshar, K.M. Surveillance study on scorpion species in Egypt and comparison of their crude venom protein profiles. The Journal of Basic & Applied Zoology 2013, 66, 76-86.	141.6	sc	Habermehl, G.G. Arthropoda. In Venomous Animals and Their Toxins; Springer: 1981; pp. 21-91.
Tityus_serrulatus	60	da Rosa, C.M.; Abegg, A.D.; Borges, L.M.; Bitencourt, G.S.; Di Mare, R.A. New record and occurrence map of Tityus serrulatus Lutz & Mello, 1922 (Scorpiones, Buthidae) in the state of Rio Grande do Sul, southern Brazil. Check List 2015, 11, 1556.	6.8	2.4	da Rosa, C.M.; Abegg, A.D.; Borges, L.M.; Bitencourt, G.S.; Di Mare, R.A. New record and occurrence map of Tityus serrulatus Lutz & Mello, 1922 (Scorpiones, Buthidae) in the state of Rio Grande do Sul, southern Brazil. Check List 2015, 11, 1556.	13.1	2.6	da Rosa, C.M.; Abegg, A.D.; Borges, L.M.; Bitencourt, G.S.; Di Mare, R.A. New record and occurrence map of Tityus serrulatus Lutz & Mello, 1922 (Scorpiones, Buthidae) in the state of Rio Grande do Sul, southern Brazil. Check List 2015, 11, 1556.	1	iv	Tu, A.T. Handbook of Natural Toxins: Insect poisons, allergens, and other invertebrate venoms. In Handbook of Natural Toxins: Insect poisons, allergens, and other invertebrate venoms; 1984
Tityus_serrulatus	60	da Rosa, C.M.; Abegg, A.D.; Borges, L.M.; Bitencourt, G.S.; Di Mare, R.A. New record and occurrence map of Tityus serrulatus Lutz & Mello, 1922 (Scorpiones, Buthidae) in the state of Rio Grande do Sul, southern Brazil. Check List 2015, 11, 1556.	6.8	2.4	da Rosa, C.M.; Abegg, A.D.; Borges, L.M.; Bitencourt, G.S.; Di Mare, R.A. New record and occurrence map of Tityus serrulatus Lutz & Mello, 1922 (Scorpiones, Buthidae) in the state of Rio Grande do Sul, southern Brazil. Check List 2015, 11, 1556.	13.1	2.6	da Rosa, C.M.; Abegg, A.D.; Borges, L.M.; Bitencourt, G.S.; Di Mare, R.A. New record and occurrence map of Tityus serrulatus Lutz & Mello, 1922 (Scorpiones, Buthidae) in the state of Rio Grande do Sul, southern Brazil. Check List 2015, 11, 1556.	0.43	sc	Zlotkin, E.; Fraenkel, G.; Miranda, F.; Lissitzky, S. The effect of scorpion venom on blowfly larvae—A new method for the evaluation of scorpion venoms potency. Toxicon 1971, 9, 1-2.
Tityus_serrulatus	60	da Rosa, C.M.; Abegg, A.D.; Borges, L.M.; Bitencourt, G.S.; Di Mare, R.A. New record and occurrence map of Tityus serrulatus Lutz & Mello, 1922 (Scorpiones, Buthidae) in the state of Rio Grande do Sul, southern Brazil. Check List 2015, 11, 1556.	6.8	2.4	da Rosa, C.M.; Abegg, A.D.; Borges, L.M.; Bitencourt, G.S.; Di Mare, R.A. New record and occurrence map of Tityus serrulatus Lutz & Mello, 1922 (Scorpiones, Buthidae) in the state of Rio Grande do Sul, southern Brazil. Check List 2015, 11, 1556.	13.1	2.6	da Rosa, C.M.; Abegg, A.D.; Borges, L.M.; Bitencourt, G.S.; Di Mare, R.A. New record and occurrence map of Tityus serrulatus Lutz & Mello, 1922 (Scorpiones, Buthidae) in the state of Rio Grande do Sul, southern Brazil. Check List 2015, 11, 1556.	1.16	ip	Nishikawa, A.; Caricati, C.P.; Lima, M.; Dos Santos, M.; Kipnis, T.; Eickstedt, V.; Knysak, I.; Da Silva, M.; Higashi, H.G.; Da Silva, W.D. Antigenic cross-reactivity among the venoms from several species of Brazilian scorpions. Toxicon 1994, 32, 989-998.
Tityus_serrulatus	60	da Rosa, C.M.; Abegg, A.D.; Borges, L.M.; Bitencourt, G.S.; Di Mare, R.A. New record and occurrence map of Tityus serrulatus Lutz & Mello, 1922 (Scorpiones, Buthidae) in the state of Rio Grande do Sul, southern Brazil. Check List 2015, 11, 1556.	6.8	2.4	da Rosa, C.M.; Abegg, A.D.; Borges, L.M.; Bitencourt, G.S.; Di Mare, R.A. New record and occurrence map of Tityus serrulatus Lutz & Mello, 1922 (Scorpiones, Buthidae) in the state of Rio Grande do Sul, southern Brazil. Check List 2015, 11, 1556.	13.1	2.6	da Rosa, C.M.; Abegg, A.D.; Borges, L.M.; Bitencourt, G.S.; Di Mare, R.A. New record and occurrence map of Tityus serrulatus Lutz & Mello, 1922 (Scorpiones, Buthidae) in the state of Rio Grande do Sul, southern Brazil. Check List 2015, 11, 1556.	1.45	sc	Habermehl, G.G. Arthropoda. In Venomous Animals and Their Toxins; Springer: 1981; pp. 21-91.
Tityus_bahiensis	61.5	Lourenço, W.R. What do we know about some of the most conspicuous scorpion species of the genus Tityus? A historical approach. Journal of Venomous Animals and Toxins including Tropical Diseases 2015, 21, 1-12.	9	3	Bucaretchi, F.; Fernandes, L.C.; Fernandes, C.B.; Branco, M.M.; Prado, C.C.; Vieira, R.J.; De Capitani, E.M.; Hyslop, S. Clinical consequences of Tityus bahiensis and Tityus serrulatus scorpion stings in the region of Campinas, southeastern Brazil. Toxicon 2014, 89, 17-25.	11.5	4	Bucaretchi, F.; Fernandes, L.C.; Fernandes, C.B.; Branco, M.M.; Prado, C.C.; Vieira, R.J.; De Capitani, E.M.; Hyslop, S. Clinical consequences of Tityus bahiensis and Tityus serrulatus scorpion stings in the region of Campinas, southeastern Brazil. Toxicon 2014, 89, 17-25.	1.38	iv	Tu, A.T. Handbook of Natural Toxins: Insect poisons, allergens, and other invertebrate venoms. In Handbook of Natural Toxins: Insect poisons, allergens, and other invertebrate venoms; 1984
Tityus_bahiensis	61.5	Lourenço, W.R. What do we know about some of the most conspicuous scorpion species of the genus Tityus? A historical approach. Journal of Venomous Animals and Toxins including Tropical Diseases 2015, 21, 1-12.	9	3	Bucaretchi, F.; Fernandes, L.C.; Fernandes, C.B.; Branco, M.M.; Prado, C.C.; Vieira, R.J.; De Capitani, E.M.; Hyslop, S. Clinical consequences of Tityus bahiensis and Tityus serrulatus scorpion stings in the region of Campinas, southeastern Brazil. Toxicon 2014, 89, 17-25.	11.5	4	Bucaretchi, F.; Fernandes, L.C.; Fernandes, C.B.; Branco, M.M.; Prado, C.C.; Vieira, R.J.; De Capitani, E.M.; Hyslop, S. Clinical consequences of Tityus bahiensis and Tityus serrulatus scorpion stings in the region of Campinas, southeastern Brazil. Toxicon 2014, 89, 17-25.	9.35	sc	Habermehl, G.G. Arthropoda. In Venomous Animals and Their Toxins; Springer: 1981; pp. 21-91.
Tityus_bahiensis	61.5	Lourenço, W.R. What do we know about some of the most conspicuous scorpion species of the genus Tityus? A historical approach. Journal of Venomous Animals and Toxins including Tropical Diseases 2015, 21, 1-12.	9	3	Bucaretchi, F.; Fernandes, L.C.; Fernandes, C.B.; Branco, M.M.; Prado, C.C.; Vieira, R.J.; De Capitani, E.M.; Hyslop, S. Clinical consequences of Tityus bahiensis and Tityus serrulatus scorpion stings in the region of Campinas, southeastern Brazil. Toxicon 2014, 89, 17-25.	11.5	4	Bucaretchi, F.; Fernandes, L.C.; Fernandes, C.B.; Branco, M.M.; Prado, C.C.; Vieira, R.J.; De Capitani, E.M.; Hyslop, S. Clinical consequences of Tityus bahiensis and Tityus serrulatus scorpion stings in the region of Campinas, southeastern Brazil. Toxicon 2014, 89, 17-25.	1.062	ip	Nishikawa, A.; Caricati, C.P.; Lima, M.; Dos Santos, M.; Kipnis, T.; Eickstedt, V.; Knysak, I.; Da Silva, M.; Higashi, H.G.; Da Silva, W.D. Antigenic cross-reactivity among the venoms from several species of Brazilian scorpions. Toxicon 1994, 32, 989-998.
Tityus_discrepans	65	Prendini, L. Further additions to the scorpion fauna of Trinidad and Tobago. The Journal of Arachnology 2001, 29, 173-188.	12.2	3.9	Prendini, L. Further additions to the scorpion fauna of Trinidad and Tobago. The Journal of Arachnology 2001, 29, 173-188.	8.76	3.23	Prendini, L. Further additions to the scorpion fauna of Trinidad and Tobago. The Journal of Arachnology 2001, 29, 173-188.	2.5	iv	De Sousa, L.; Parrilla-Alvarez, P.; Quiroga, M. An epidemiological review of scorpion stings in Venezuela: the Northeastern region. Journal of Venomous Animals and Toxins 2000, 6, 128-166.
Tityus_discrepans	65	Prendini, L. Further additions to the scorpion fauna of Trinidad and Tobago. The Journal of Arachnology 2001, 29, 173-188.	12.2	3.9	Prendini, L. Further additions to the scorpion fauna of Trinidad and Tobago. The Journal of Arachnology 2001, 29, 173-188.	8.76	3.23	Prendini, L. Further additions to the scorpion fauna of Trinidad and Tobago. The Journal of Arachnology 2001, 29, 173-188.	8.8	sc	De Sousa, L.; Parrilla-Alvarez, P.; Quiroga, M. An epidemiological review of scorpion stings in Venezuela: the Northeastern region. Journal of Venomous Animals and Toxins 2000, 6, 128-166.
Tityus_stigmurus	61	Ross, L.K. Confirmation of parthenogenesis in the medically significant, synanthropic scorpion Tityus stigmurus (Thorell, 1876)(Scorpiones: Buthidae). Revista Ibérica de Aracnología 2010, 18, 115-121.	6.3	2	De Souza, C.A.R.; Candido, D.M.; Lucas, S.M.; Brescovit, A.D. On the Tityus stigmurus complex (Scorpiones, Buthidae). Zootaxa 2009, 1987, 1–38-31–38.	12.2	11.7	De Souza, C.A.R.; Candido, D.M.; Lucas, S.M.; Brescovit, A.D. On the Tityus stigmurus complex (Scorpiones, Buthidae). Zootaxa 2009, 1987, 1–38-31–38.	0.773	ip	Nishikawa, A.; Caricati, C.P.; Lima, M.; Dos Santos, M.; Kipnis, T.; Eickstedt, V.; Knysak, I.; Da Silva, M.; Higashi, H.G.; Da Silva, W.D. Antigenic cross-reactivity among the venoms from several species of Brazilian scorpions. Toxicon 1994, 32, 989-998.
Tityus_cambridgei	80	Lourenço, W.; Huber, D.; Cloudsley-Thompson, J. Notes on the ecology, distribution and postembryonic development of Tityus cambridgei Pocock, 1897 (Scorpiones, Buthidae) from French Guyana and Oriental Amazonia. Entomologische Mitteilungen aus dem Zoologischen Museum Hamburg 2000, 13, 197-203.	6.65	2.32	Lourenço, W.R.; Leguin, E.-A. The true identity of Scorpio (Atreus) obscurus Gervais, 1843 (Scorpiones, Buthidae). Euscorpius 2008, 2008, 1-9.	13.01	2.32	Lourenço, W.R.; Leguin, E.-A. The true identity of Scorpio (Atreus) obscurus Gervais, 1843 (Scorpiones, Buthidae). Euscorpius 2008, 2008, 1-9.	12.136	ip	Nishikawa, A.; Caricati, C.P.; Lima, M.; Dos Santos, M.; Kipnis, T.; Eickstedt, V.; Knysak, I.; Da Silva, M.; Higashi, H.G.; Da Silva, W.D. Antigenic cross-reactivity among the venoms from several species of Brazilian scorpions. Toxicon 1994, 32, 989-998.
Leiurus_abdullahbayrami	63	Yağmur, E.A.; Koç, H.; Kunt, K.B. Description of a new species of Leiurus Ehrenberg, 1828 (Scorpiones: Buthidae) from southеastеrn Turkey. Euscorpius 2009, 2009,	8.47	3.35	Yağmur, E.A.; Koç, H.; Kunt, K.B. Description of a new species of Leiurus Ehrenberg, 1828 (Scorpiones: Buthidae) from southеastеrn Turkey. Euscorpius 2009, 2009,	12.28	2.7	Yağmur, E.A.; Koç, H.; Kunt, K.B. Description of a new species of Leiurus Ehrenberg, 1828 (Scorpiones: Buthidae) from southеastеrn Turkey. Euscorpius 2009, 2009,	0.19	sc	Ozkan, O.; Yagmur, E.; Ark, M. A newly described scorpion species, Leiurus abdullahbayrami (Scorpion: Buthidae), and the lethal potency and in vivo effects of its venom. Journal of venomous animals and toxins including tropical diseases 2011, 17, 414-421
Rhopalurus_junceus	83.7	Teruel, R.; de Armas, L.F. Redescripción de Rhopalurus junceus (Herbst 1800)(Scorpiones: Buthidae). Boletín de la Sociedad Entomológica Aragonesa 2012, 50, 153-174.	10.65	3.45	Teruel, R.; de Armas, L.F. Redescripción de Rhopalurus junceus (Herbst 1800)(Scorpiones: Buthidae). Boletín de la Sociedad Entomológica Aragonesa 2012, 50, 153-174.	5.85	3.9	Teruel, R.; de Armas, L.F. Redescripción de Rhopalurus junceus (Herbst 1800)(Scorpiones: Buthidae). Boletín de la Sociedad Entomológica Aragonesa 2012, 50, 153-174.	8	sc	Lourenço, W.R.; Cloudsley-Thompson, J. Stridulatory apparatus and the evolutionary significance of sound production in Rhopalurus species (Scorpiones: Buthidae). Journal of arid environments 1995, 4, 423-429.
Rhopalurus_agamemnon	100	Esposito, L.A.; Yamaguti, H.Y.; Souza, C.A.; Pinto-Da-Rocha, R.; Prendini, L. Systematic revision of the neotropical club-tailed scorpions, Physoctonus, Rhopalurus, and Troglorhopalurus, revalidation of Heteroctenus, and descriptions of two new genera and three new species (Buthidae: Rhopalurusinae). Bulletin of the American Museum of Natural History 2017, 2017, 1-136.	9	4.2	Esposito, L.A.; Yamaguti, H.Y.; Souza, C.A.; Pinto-Da-Rocha, R.; Prendini, L. Systematic revision of the neotropical club-tailed scorpions, Physoctonus, Rhopalurus, and Troglorhopalurus, revalidation of Heteroctenus, and descriptions of two new genera and three new species (Buthidae: Rhopalurusinae). Bulletin of the American Museum of Natural History 2017, 2017, 1-136.	30	10	Esposito, L.A.; Yamaguti, H.Y.; Souza, C.A.; Pinto-Da-Rocha, R.; Prendini, L. Systematic revision of the neotropical club-tailed scorpions, Physoctonus, Rhopalurus, and Troglorhopalurus, revalidation of Heteroctenus, and descriptions of two new genera and three new species (Buthidae: Rhopalurusinae). Bulletin of the American Museum of Natural History 2017, 2017, 1-136.	36.363	ip	Nishikawa, A.; Caricati, C.P.; Lima, M.; Dos Santos, M.; Kipnis, T.; Eickstedt, V.; Knysak, I.; Da Silva, M.; Higashi, H.G.; Da Silva, W.D. Antigenic cross-reactivity among the venoms from several species of Brazilian scorpions. Toxicon 1994, 32, 989-998.
Brotheas_amazonicus	65	Lourenço, W.; WR, L. Révision du genre Rhopalurus Thorell, 1876 (Scorpiones, Buthidae). 1982.	10.55	4	Lourenço, W.; WR, L. Révision du genre Rhopalurus Thorell, 1876 (Scorpiones, Buthidae). 1982.	15.7	5.6	Lourenço, W.; WR, L. Révision du genre Rhopalurus Thorell, 1876 (Scorpiones, Buthidae). 1982.	90.909	ip	Nishikawa, A.; Caricati, C.P.; Lima, M.; Dos Santos, M.; Kipnis, T.; Eickstedt, V.; Knysak, I.; Da Silva, M.; Higashi, H.G.; Da Silva, W.D. Antigenic cross-reactivity among the venoms from several species of Brazilian scorpions. Toxicon 1994, 32, 989-998.
Heterometrus_laoticus	107.5	Kovařík, F. A review of the genus Heterometrus Ehrenberg, 1828, with descriptions of seven new species (Scorpiones, Scorpionidae). Euscorpius 2004, 2004, 1-60.	9.2	5.5	Booncham, U.; Sitthicharoenchai, D.; Pradatsundarasar, A.-o.; Prasarnpun, S.; Thirakhupt, K. Sexual dimorphism in the Asian giant forest scorpion, Heterometrus laoticus Couzijn, 1981. NU. International Journal of Science 2007, 4, 42-52.	31	14.32	Booncham, U.; Sitthicharoenchai, D.; Pradatsundarasar, A.-o.; Prasarnpun, S.; Thirakhupt, K. Sexual dimorphism in the Asian giant forest scorpion, Heterometrus laoticus Couzijn, 1981. NU. International Journal of Science 2007, 4, 42-52.	190	sc	Hoang, A.N.; Vo, H.D.; Vo, N.P.; Kudryashova, K.S.; Nekrasova, O.V.; Feofanov, A.V.; Kirpichnikov, M.P.; Andreeva, T.V.; Serebryakova, M.V.; Tsetlin, V.I. Vietnamese Heterometrus laoticus scorpion venom: evidence for analgesic and anti-inflammatory activity and isolation of new polypeptide toxin acting on Kv1. 3 potassium channel. Toxicon 2014, 77, 40-48
Heterometrus_laoticus	107.5	Kovařík, F. A review of the genus Heterometrus Ehrenberg, 1828, with descriptions of seven new species (Scorpiones, Scorpionidae). Euscorpius 2004, 2004, 1-60.	9.2	5.5	Booncham, U.; Sitthicharoenchai, D.; Pradatsundarasar, A.-o.; Prasarnpun, S.; Thirakhupt, K. Sexual dimorphism in the Asian giant forest scorpion, Heterometrus laoticus Couzijn, 1981. NU. International Journal of Science 2007, 4, 42-52.	31	14.32	Booncham, U.; Sitthicharoenchai, D.; Pradatsundarasar, A.-o.; Prasarnpun, S.; Thirakhupt, K. Sexual dimorphism in the Asian giant forest scorpion, Heterometrus laoticus Couzijn, 1981. NU. International Journal of Science 2007, 4, 42-52.	12	iv	Hoang, A.N.; Vo, H.D.; Vo, N.P.; Kudryashova, K.S.; Nekrasova, O.V.; Feofanov, A.V.; Kirpichnikov, M.P.; Andreeva, T.V.; Serebryakova, M.V.; Tsetlin, V.I. Vietnamese Heterometrus laoticus scorpion venom: evidence for analgesic and anti-inflammatory activity and isolation of new polypeptide toxin acting on Kv1. 3 potassium channel. Toxicon 2014, 77, 40-49
