# Supplementary material for: Scorpion Species with Smaller Body Sizes and Narrower Chelae Have the Highest Venom Potency
Source: Toxins (Basel). 2022 Mar 17;14(3):219. doi: 10.3390/toxins14030219 (PMC8951363; doi:10.3390/toxins14030219)
Supplement: Supplementary file 1 [file toxins-14-00219-s001.zip › File S3_phylogeny]

((Brotheas_amazonicus:0.1714285714,((Opistophthalmus_glabrifrons:0.05714285714,Heterometrus_laoticus:0.05714285714,Pandinus_exitialis:0.05714285714)Scorpioninae_ott441352:0.05714285714,(Hadogenes_troglodytes:0.02857142857,Hemiscorpius_lepturus:0.02857142857)Hemiscorpiidae_ott524925:0.08571428571)Scorpionoidea_ott270739:0.05714285714,Hadrurus_arizonensis:0.1714285714)Iurida_ott815451:0.8285714286,((Centruroides_noxius:0.08571428571,Centruroides_sculpturatus:0.08571428571,Scorpio_maurus:0.08571428571,Centruroides_tecomanus:0.08571428571)Centruroides_ott562565:0.7142857143,(Androctonus_bicolor:0.05714285714,Androctonus_crassicauda:0.05714285714,Androctonus_amoreuxi:0.05714285714)Androctonus_ott511970:0.7428571429,Compsobuthus_acutecarinatus:0.8,(Tityus_discrepans:0.1428571429,Tityus_cambridgei:0.1428571429,Tityus_bahiensis:0.1428571429,Tityus_stigmurus:0.1428571429,Mesobuthus_eupeus:0.1428571429,Tityus_serrulatus:0.1428571429)Tityus_ott549921:0.6571428571,(Centruroides_limpidus:0.05714285714,Buthus_occitanus:0.05714285714,Parabuthus_transvaalicus:0.05714285714)Parabuthus_ott154570:0.7428571429,Androctonus_australis:0.8,(Androctonus_mauritanicus:0.05714285714,Leiurus_quinquestriatus:0.05714285714,Leiurus_abdullahbayrami:0.05714285714)Microtityus_ott562990:0.7428571429,(Rhopalurus_junceus:0.02857142857,Rhopalurus_agamemnon:0.02857142857)Rhopalurus_ott433184:0.7714285714,(Hottentotta_minax:0.02857142857,Hottentotta_judaicus:0.02857142857)Hottentotta_ott41679:0.7714285714,Odontobuthus_doriae:0.8,(Buthacus_arenicola:0.02857142857,Buthacus_leptochelys:0.02857142857)Buthacus_ott270733:0.7714285714,Buthiscus_bicalcaratus:0.8)Buthidae_ott511971:0.2)Scorpiones_ott511964:1;
